# Supplementary material
Source: PubMed Central journal article supplement (PMC4267055)
Supplement: NIHMS633374-supplement-1.pdf [file NIHMS633374-supplement-1.pdf]

# Supplementary Figure 1

**A**

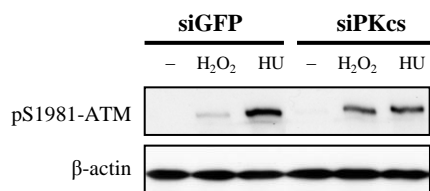

**B**

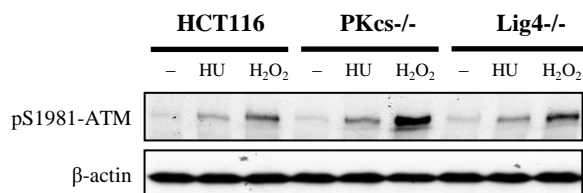

**Figure S1. ATM hyperactivation to oxidative stress is independent of DSB repair and the NHEJ pathway.** (A) HeLa cells were transfected with control siRNA or DNA-PKcs siRNA. At 72 h after initial transfection, HeLa cells were treated with 50  $\mu$ M H<sub>2</sub>O<sub>2</sub> or 5mM hydroxyurea for 30 min followed by western blot analysis. The reduction of HU-induced ATM Ser1981 phosphorylation in DNA-PKcs knockdown cells likely reflected the decreased level of total ATM protein. (B) Wild type, DNA-PKcs<sup>-/-</sup>, and Lig4<sup>-/-</sup> HCT116 cells were treated with 50  $\mu$ M H<sub>2</sub>O<sub>2</sub> or 5mM hydroxyurea for 30 min followed by western blot analysis.

# Supplementary Figure 2

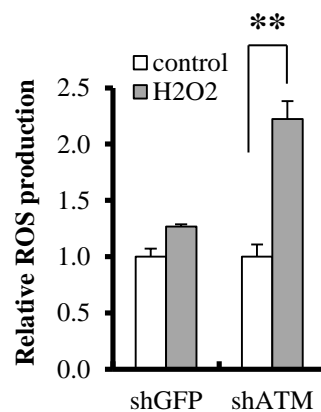

**Figure S2. ATM depletion increases ROS production.** HeLa cells were transfected with control or siATM for 48 h and were analyzed for total ROS production in response to H<sub>2</sub>O<sub>2</sub> treatment (50  $\mu$ M H<sub>2</sub>O<sub>2</sub>, 30min). \*\*, P < 0.01.
